# Supplementary material for: Transcriptome Analysis Reveals That C17 Mycosubtilin Antagonizes Verticillium dahliae by Interfering with Multiple Functional Pathways of Fungi
Source: MDPI journal article supplement (doi:10.3390/biology12040513), 2023-03-29
Supplement: s1 [file s1]

**Table S4 Primers used for qRT-PCR**

| <b>NO.</b> | <b>Primer names</b> | <b>Sequences (5'to3')</b> |
|------------|---------------------|---------------------------|
| 1          | 03948L              | TTCTCATCGTCTGGGTTTCTG     |
| 2          | 03948R              | GAGAATAGCGAGGGTGAAGC      |
| 3          | 09779L              | CAAGTCCGTGAAGACCATCTC     |
| 4          | 09779R              | GAGGGAGCAGAGGGAGTAG       |
| 5          | 03930L              | GTTCTCCACTACCTGCCATTC     |
| 6          | 03930R              | TGGCGTACTGGATTGTCTTG      |
| 7          | 06452L              | GGCGACAACCTTTTACAAGCAG    |
| 8          | 06452R              | GAGTGGTCGTAGTCCTTTTGG     |
| 9          | 05522L              | ATGCCTCCGAGTTTATGACC      |
| 10         | 05522R              | GGGCTATCGTACTTTTCCTGG     |
| 11         | 07309L              | TTTGGTGTTCTCGTCATCCC      |
| 12         | 07309R              | TTTGATAGCCTGGAAGAGCG      |
| 13         | 07051L              | GTTGGTATCGTGGGCTACATC     |
| 14         | 07051R              | GTACCAGTTCCTGTAGAAGCG     |
| 15         | 08928L              | AGATCCACGAGTACCTCTTCC     |
| 16         | 08928R              | CGACTGGAGAGCCTTGATG       |
| 17         | 07089L              | GTCCTGAAGTTCGCCCAC        |
| 18         | 07089R              | GGGTGATGTAGTTGGTGAAGG     |
| 19         | $\beta$ -tubulin L  | AGTTCACTGCCATGTTCCG       |
| 20         | $\beta$ -tubulin R  | TCATGTTGAACTCAGCCTCAG     |
